# Supplementary material
Source: PubMed Central journal article supplement (PMC8717235)
Supplement: mmc1.pdf [file mmc1.pdf]

**XINN, Volume 3**

## **Supplemental Information**

### **Antibody neutralization to SARS-CoV-2 and variants after 1 year in Wuhan, China**

**Qianyun Liu, Qing Xiong, Fanghua Mei, Chengbao Ma, Zhen Zhang, Bing Hu, Junqiang Xu, Yongzhong Jiang, Faxian Zhan, Suhua Zhou, Li Tao, Xianying Chen, Ming Guo, Xin Wang, Yaohui Fang, Shu Shen, Yingle Liu, Fang Liu, Li Zhou, Ke Xu, Changwen Ke, Fei Deng, Kun Cai, Huan Yan, Yu Chen, and Ke Lan**

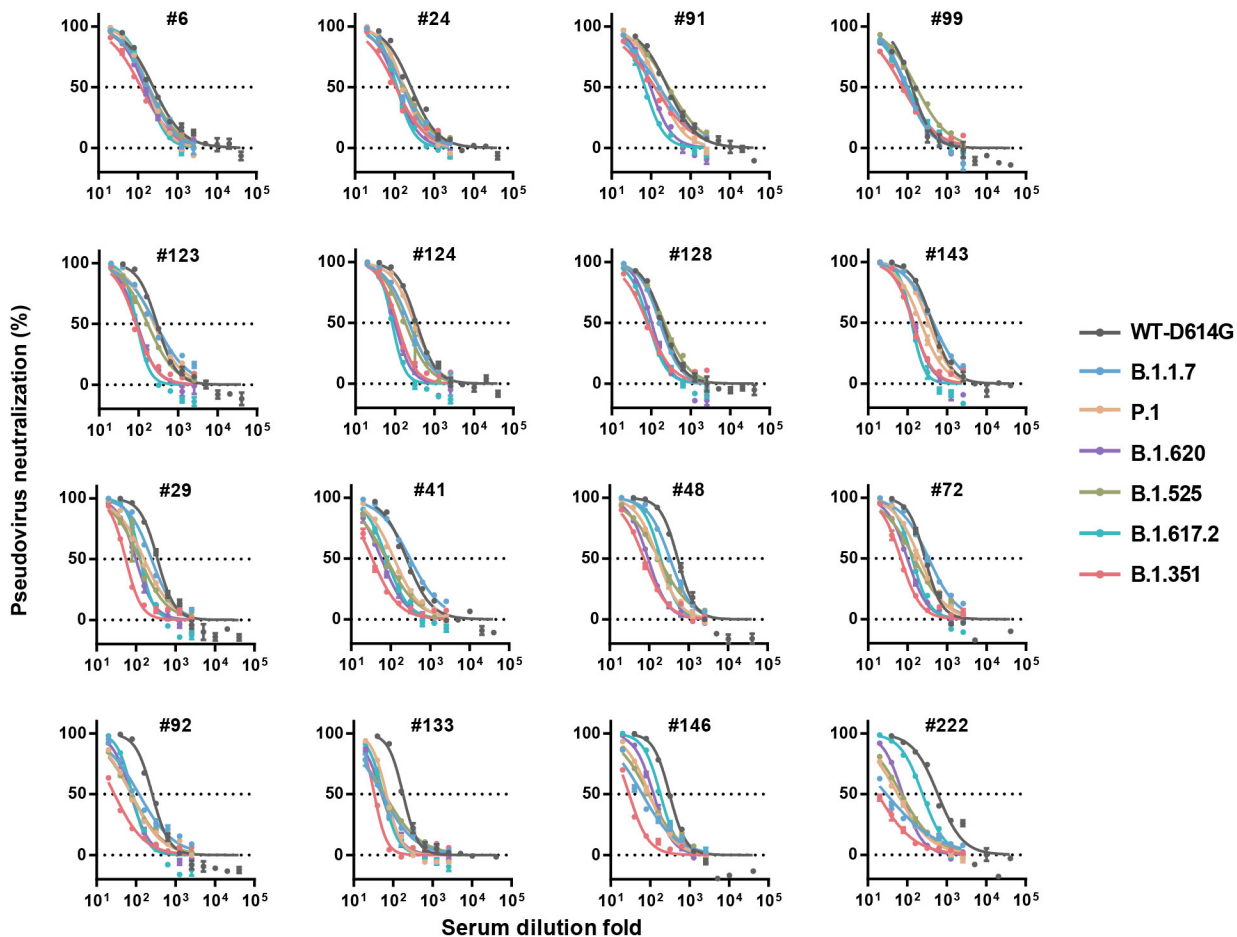

|                      | Sample number | WT-D614G | B.1.1.7 | P.1   | B.1.620 | B.1.525 | B.1.617.2 | B.1.351 |
|----------------------|---------------|----------|---------|-------|---------|---------|-----------|---------|
| <b>Serum Group 1</b> | 6             | 245.5    | 181.6   | 173.8 | 148     | 188.5   | 170       | 119.3   |
|                      | 24            | 263      | 158.1   | 171.4 | 115.2   | 180.1   | 115.3     | 107.5   |
|                      | 91            | 262.4    | 163.4   | 158.4 | 96.73   | 277.7   | 70.11     | 124.5   |
|                      | 99            | 129      | 93.78   | 93.78 | 90.52   | 166.3   | 100.9     | 74.42   |
|                      | 123           | 294      | 273     | 243.9 | 92.73   | 170.4   | 89.97     | 85.22   |
|                      | 124           | 354.1    | 227.2   | 309.4 | 99.46   | 183.2   | 84.89     | 113.9   |
|                      | 128           | 194.4    | 166.5   | 166.5 | 102.9   | 214.7   | 84.48     | 79.45   |
|                      | 143           | 421.9    | 453.7   | 338.3 | 141.5   | 217.6   | 127.7     | 137.5   |
| <b>Serum Group 2</b> | 29            | 349.3    | 246.6   | 160.1 | 98.93   | 124.8   | 128.8     | 54.84   |
|                      | 41            | 252.9    | 310.8   | 121.9 | 58.07   | 77.15   | 78.92     | 34.12   |
|                      | 48            | 530.2    | 336.8   | 166.5 | 94.28   | 176.9   | 197       | 74.45   |
|                      | 72            | 277.8    | 344.6   | 203.2 | 98.75   | 148.4   | 131.2     | 67.62   |
|                      | 92            | 258      | 119.4   | 75.95 | 73.57   | 76.3    | 80.39     | 28.37   |
|                      | 133           | 179      | 52.67   | 67.74 | 51.53   | 60.39   | 56.11     | 33.45   |
|                      | 146           | 310.8    | 63.52   | 95.88 | 122     | 90.64   | 181.5     | 29.37   |
|                      | 222           | 595.1    | 29.63   | 57.09 | 76.43   | 71.21   | 243.8     | 17.84   |
